# Supplementary material for: Mouse genetic background contributes to hepatocyte susceptibility to Fas-mediated apoptosis
Source: PubMed Central journal article supplement — Mol Biol Cell. 2016 Oct 15;27(20):3005–12. doi: 10.1091/mbc.E15-06-0423 (PMC5063609; doi:10.1091/mbc.e15-06-0423), 2016-10-15
Supplement: supp_E15-06-0423v1_CombinedSupMats.pdf [file supp_E15-06-0423v1_CombinedSupMats.pdf]

# Supplemental Materials

*Molecular Biology of the Cell*

Weerasinghe et al.

Figure S1

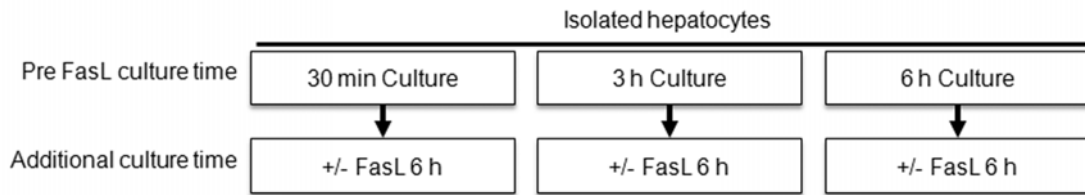

**Fig S1. Experimental outline of hepatocyte pre-culture conditions prior to the addition of FasL.** Primary hepatocytes were isolated from FVB/N, C57BL/6 and C3H/He mice by liver perfusion. Cells were cultured for 30 min, 3 h or 6 h following by the addition of Fas-L for 6h (0.5 $\mu$ g/ml).

Figure S2

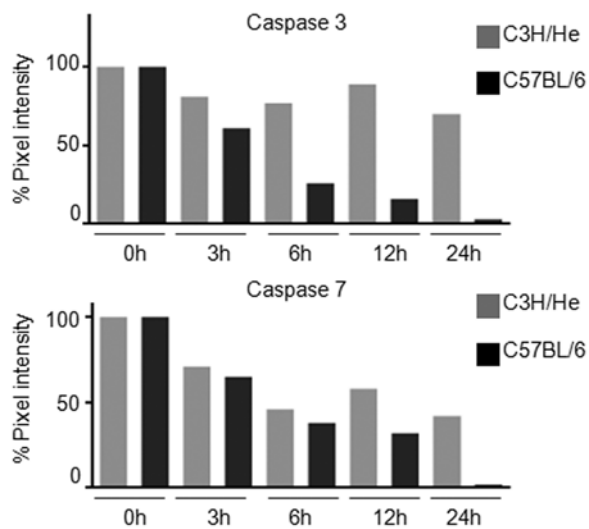

**Fig S2. Densitometry analysis of the protein blots shown in Figure 2A.** The data is representative of two independent experiments which showed similar findings.



Figure S4

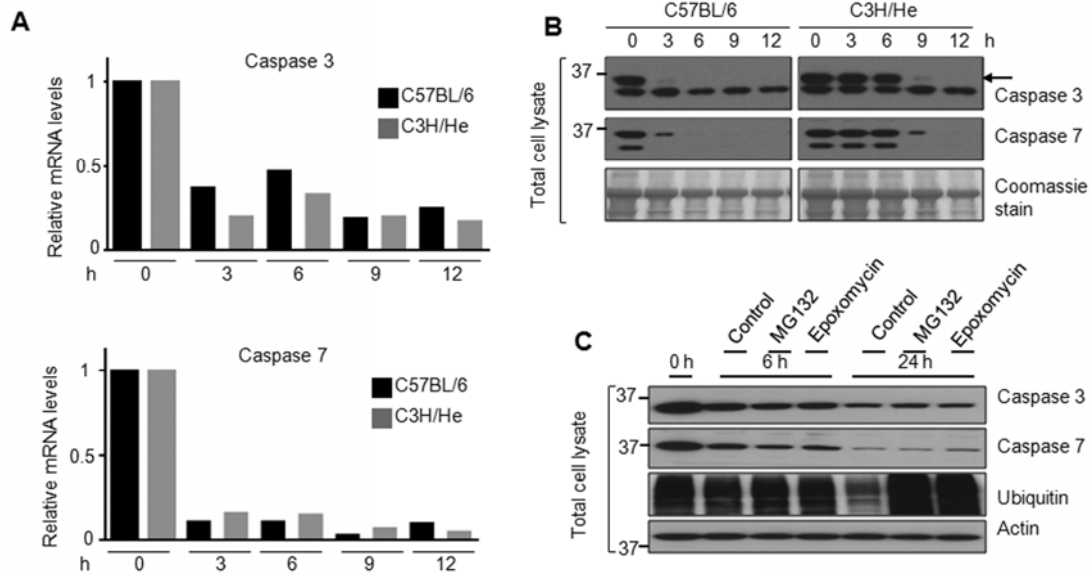

**Fig S4. Relative mRNA and protein expression in hepatocytes from C57BL/6 and C3H/He mice, and effect of proteasome inhibition on caspase protein stability.** (A) Changes in relative mRNA expression of caspase 3 (top) and caspase 7 (bottom) with culture time. Hepatocytes were obtained from the indicated mouse strains followed by isolation of total RNA and qPCR analysis as described in Materials and Methods. The results are from one experiment, with findings that are very similar to a repeat independent experiment. (B) Relative protein expression from the same hepatocytes used in panel A. (C) Hepatocytes were isolated from FVB/N mice and cultured in the absence or presence of the proteasome inhibitors MG132 (10 $\mu$ M) and epoxomycin (10  $\mu$ M). Hepatocytes were collected at the indicated time after treatment, and total cell lysates were prepared and analyzed by immunoblotting.
